# Supplementary material
Source: publisher figshare collection journal article supplement (https://brill.figshare.com/articles/dataset/_/21354816)
Supplement: Supplementary file 1 [file 1]

(a) Primers used in the present study.

| Locus | Primer sequence F.                          | Primer sequence R.                         | bp*  | Reference                        |
|-------|---------------------------------------------|--------------------------------------------|------|----------------------------------|
| NT3   | NT3-F3 ATATTTCTGGCTTTTCTCTGTGGC             | NT3-R4<br>GCGTTTCATAAAAATATTGTTTGACCGG     | 498  | Rivera et. al., (2011).          |
| C-mos | L39 CTGSARYTTTCTYCATCTGT                    | S78 CCTTGGGTGTGATTTTCTCACCT                | 700  | Rivera et.al.,(2011).            |
| Rag1  | RAG1F GCAGCTTTGGTGGCTGCCCT                  | RAG1R ACAGTGCAGTGCATCTATTGAAGGC            | 678  | Reynolds<br>et.al.,(2013).       |
| BDNF  | BDNF-F<br>GACCATCCTTTTCTKACTATGGTTATTTCACTT | BDNF-R<br>CTATCTTCCCTTTTAATGGTCAGTGTACAAAC | 671  | Noonan and<br>Chippindale(2006). |
| ODC   | OD-F GACTCCAAAGCAGTTTGTCTGTCTCAGTGT         | OD-R<br>TCTTCAGAGCCAGGGAAGCCACCACCAAT      | 513  | Friesen et al.,<br>(1999).       |
| Cytb  | L144910 GACCTGTGATMTGAAAACAYCGTTGT          | H16064 CTTTGGTTTACAAGAACAATGCTTTA          | 1113 | Rivera et. al.,(2011)            |
| Cytb  | Cytb1F CAGTAGCAACCAANATCTCA                 | Cytb1R GGAGATAATTCCGAATGGNAG               | 500  | Murtskhvaladze<br>2021           |

\* Base pairs in the amplified fragment.

(b) Sequences used in this study (obtained from the available tissue samples, marked by, and downloaded from GenBank).

| Species | <i>Boa constrictor</i> | <i>E. murinus</i> | <i>E. notaeus</i> | <i>E. deschauenseei</i>                            | <i>E. beniensis</i> |
|---------|------------------------|-------------------|-------------------|----------------------------------------------------|---------------------|
| Cyt-b*  | 1 (F02)                | 2 (A01, H01)      | 1 (D03)           | 11 (A02,B01-02,<br>C02,D02,E01-<br>02,F01,G01)     | 2 (H03,G02)         |
| BDNF*   | 1 (F02)                | 2 (A01, H01)      | 1 (B03)           | 10 (A02,B01-02, C01-<br>02,D02,E01-02,F01,<br>G01) | 1 (H03)             |

|        |                            |                                  |                                                 |                                              |             |
|--------|----------------------------|----------------------------------|-------------------------------------------------|----------------------------------------------|-------------|
| RAG1*  | 1 (F02)                    | 2 (A01, H01)                     | 2 (E03,F03)                                     | 9 (A02,B01-02, C01-02,D02,E02,F01,G01)       | 0           |
| NT3*   | 1 (F02)                    | 2 (A01, H01)                     | 3 (D03,F03,E03)                                 | 11(A02,B01-02,C01-02,D01-02,E01-02,F01,G01 ) | 2 (H03,G02) |
| ODC*   | 1 (F02)                    | 1 (H01)                          | 0                                               | 9 (A02,B01-02, C01-02,D02,E02,F01,G01)       | 2 (H03,G02) |
| C-mos* | 1 (F02)                    | 1 (H01)                          | 1 (D03)                                         | 7 (A02,B01-02, C01-02,D02,F01)               | 0           |
| Cyt-b  | 3 (KF576726-727, EU273654) | 3 (U69808 - 809, KC329952)       | 3 (KC329953, U69810)                            |                                              |             |
| BDNF   | 2 (KF576914, KF576819)     | 1 (KC330075)                     | 4 (KF576916- 917, KC330076, AY988029)           |                                              |             |
| RAG1   | 1 (KF576908)               | 2 (KC330042, HQ399517)           | 5 (KF576749- 750, HQ399516, AY988063, KC330043) |                                              |             |
| NT3    | 2 (AY988047, KC330109 )    | 3 (HQ399527, JX576187, KC330140) | 3 (KC330141, HQ399526, AY988046)                |                                              |             |
| ODC    | 1 (DQ465531)               |                                  | 1 (DQ465530)                                    |                                              |             |
| C-mos  | 1 (HQ399543)               | 1 (HQ399537)                     | 1 (HQ399536)                                    |                                              |             |

\* new sequences obtained within this study.
