# Supplementary material
Source: publisher figshare collection journal article supplement (https://brill.figshare.com/articles/dataset/_/21354816)
Supplement: Supplementary file 1 [file 1]

## Sheet: all_data
Number	species	sex	Country	Location	E (approx.)	N (approx.)	Museum	Coll-No	DNA label	Specimen	SVL	SL	TL	LAS	HL	HW	SpL	ED	30-V	10-SC	Ventralia	SC	DO	SL right	SL left	IL right	IL left	SO right	SO left	OCU right	OCU left	SF	HS	DB	Populations
N/A	Boa constrictor	unknown	Brasil	Marajó: Santa Cruz do Arari	-49.1689	-0.664182	N/A	N/A	F02	N/A	N/A	N/A	N/A	N/A	N/A	N/A	N/A	N/A	N/A	N/A	N/A	N/A	N/A	N/A	N/A	N/A	N/A	N/A	N/A	N/A	N/A	N/A	N/A	N/A	N/A
184	E. beniensis	male	Bolivia	Trinidad, Beni	N/A	N/A	AMNH	101924 (Holotype)	N/A	complete	134	36	170	0.8	5.7	3.1	1.5	1.5	2	1.9	226	57	50	15	14	19	18	3	4	7	7	6	5	95	22
409	E. beniensis	male	Bolivia	Trinidad to San Ignacio de Moxos, 9 km from Rio Marmoré - Rio Tijamuchi	-65.1331	-14.85	MHNNKM	NKR (1950??)	H03	complete	151	28	179	0.8	5.8	3.6	1.6	1.6	1.9	1.9	230	54	51	15	14	18	19	2	2	7	7	5	5	94	22
410	E. beniensis	male	Bolivia	Trinidad, Beni	-66.167	-11.13	MHNNKM	NKR 1735	G02	head, skin, tail	184.5	33	217.5	0.9	6	3.8	1.5	1.5	2.4	2.2	219	59	50	15	15	18	18	2	2	8	8	6	5	113	22
182	E. beniensis	female	Bolivia	Rio Itenez, between Piedras Negras a. Mategua	-62.76	-12.98	AMNH	101921	N/A	head, skin, tail	288	36	324	0.6	9.8	7.5	2.5	2.7	3.6	2.8	226	45	51	15	14	17	16	4	2	7	8	6	5	112	22
344	E. beniensis	female	Bolivia	N/A	N/A	N/A	BMNH	94.5.4.2	N/A	complete	180	22.5	202.5	0.45	6	4.6	1.6	1.6	1.9	1.4	249	54	49	15	15	18	20	2	2	8	8	6	5	78	22
306	E. deschauenseei	female	Brasil	Marajo, Santa Cruz do Arari	-49.1689	-0.664182	ZIS	5082	N/A	complete	137.7	16.8	154.5	0.15	4.6	2.6	1.3	1.2	1.4	1	220	51	46	13	13	17	18	1	1	7	6	6	5	133	19
416	E. deschauenseei	female	Brasil	Marajó: Santa Cruz do Arari	-49.1689	-0.664182	released	Andrea	G01	complete	136	26	162	0.4	5.2	3.2	1.5	1.5	1.8	1.4	219	59	47	14	13	17	17	1	2	7	7	6	5	114	19
420	E. deschauenseei	female	Brasil	Marajó: Santa Cruz do Arari	-49.1689	-0.664182	MPEG	unknown	N/A	complete	135	23	158	0.45	4.8	2.9	1.4	1.3	1.6	1.1	226	57	45	14	13	19	17	1	1	7	7	6	5	122	19
422	E. deschauenseei	female	Brasil	Marajó: Santa Cruz do Arari	-49.1689	-0.664182	MPEG	unknown	N/A	complete	143	22	165	0.3	4.7	2.9	1.5	1.4	1.9	1.2	223	53	46	13	13	16	16	2	1	7	7	6	5	127	19
423	E. deschauenseei	female	Brasil	Marajó: Santa Cruz do Arari	-49.1689	-0.664182	MPEG	unknown	N/A	complete	135	24	159	0.5	5.3	3.4	1.5	1.6	1.9	1.3	222	56	47	14	14	18	18	1	1	6	7	5	5	121	19
426	E. deschauenseei	female	Brasil	Marajó: Ilha da Roca, Municipio de Cachoeira	-48.8833	-1.18333	MPEG	18019	N/A	complete	141	24	165	0.4	5.1	3.9	1.3	1.4	1.8	1.4	222	56	46	14	13	17	17	2	1	8	7	6	5	122	19
612	E. deschauenseei	female	Brasil	Marajo	-48.8833	-1.18333	IB	20427	N/A	complete	142	21	163	0.4	5	3.5	1.5	1.4	1.8	1	226	59	46	13	15	17	18	1	1	7	7	6	5	124	19
618	E. deschauenseei	female	Brasil	Marajó, Tuiuiu	-49.1336	-0.827392	IB	17801	N/A	complete	145	23	178	0.4	4.7	3.2	1.5	1.4	1.6	1.2	225	55	46	14	12	18	16	1	1	6	6	6	5	100	19
685	E. deschauenseei	female	Brasil	Marajo, Tuiuiu	-49.1336	-0.827392	IB	17791	N/A	complete	151	25	176	0.4	4.9	2.9	1.5	1.4	1.8	1.6	227	61	46	13	13	18	17	1	1	7	7	5	5	114	19
686	E. deschauenseei	female	Brasil	Marajo, Tuiuiu	-49.1336	-0.827392	IB	17826	N/A	complete	138	20.8	158.8	0.4	4.7	3	1.5	1.5	1.5	1.3	224	51	50	14	15	19	18	1	2	6	7	6	5	125	19
323	E. deschauenseei	female	Brasil	Marajo, Tuiuiu	-49.1336	-0.827392	ZSM	31/1911	N/A	complete	137.5	20.5	158	0.15	4.4	3	1.3	1.3	1.5	0.8	214	59	47	14	14	18	16	1	1	7	7	6	5	122	21
427	E. deschauenseei	female	Brasil	Almeirim, Rio Jari, Saeo Raimundo	-52.3584	-1.11367	MPEG	16353	N/A	complete	173	27	200	0.5	5.3	4.1	1.9	1.6	2.1	1.6	227	53	45	13	14	16	18	1	1	8	7	6	5	114	21
609	E. deschauenseei	female	Brasil	Monte Alegro, Curral grande Fz. Bom Jesus	-54.0435	-1.98004	IB	40787	N/A	head, skin, tail	231	33	261	0.6	7.2	5.1	1.9	2	3.2	1.9	228	57	46	14	14	19	19	1	1	7	7	6	5	114	21
625	E. deschauenseei	female	Brasil	Monte Alegro, Curral grande Fz. Bom Jesus	-54.0435	-1.98004	IB	40789	N/A	head, skin, tail	224	33.5	257.5	0.55	7.7	5.5	2.4	2.3	3	2	236	54	49	14	14	18	18	1	2	6	6	5	5	110	21
626	E. deschauenseei	female	Brasil	Monte Alegro, Curral grande Fz. Bom Jesus	-54.0435	-1.98004	IB	40788	N/A	head, skin, tail	219	31	250	0.45	7	4.2	2	2.05	2.6	1.6	232	55	46	16	16	18	18	3	1	8	7	6	5	124	21
627	E. deschauenseei	female	Brasil	Monte Alegro, Curral grande Fz. Bom Jesus	-54.0435	-1.98004	IB	40854	N/A	head, skin, tail	245	34	279	0.6	7.8	5.5	2.4	2.3	3	1.7	224	54	47	14	15	18	18	1	1	7	7	6	5	131	21
628	E. deschauenseei	female	Brasil	Monte Alegro, Curral grande Fz. Bom Jesus	-54.0435	-1.98004	IB	40693	N/A	head, skin, tail	264	37	301	0.7	8.3	6	2.4	2.2	3.2	2.8	221	54	51	15	14	17	18	1	2	7	6	5	5	103	21
311	E. deschauenseei	male	Brasil	Marajo, Tuyuyu	-49.1336	-0.827392	SMF	62617	N/A	complete	143.3	23.2	166.5	0.9	5.5	3	1.4	1.4	1.5	1.4	230	57	49	14	13	17	17	1	1	7	7	5	5	119	19
417	E. deschauenseei	male	Brasil	Marajó: Santa Cruz do Arari	-49.1689	-0.664182	released	Miriam	F01	complete	142	27	169	0.9	5.1	3.2	1.4	1.5	1.7	1.4	222	54	47	14	15	18	17	2	1	7	8	5	5	111	19
418	E. deschauenseei	male	Brasil	Marajó: Santa Cruz do Arari	-49.1689	-0.664182	released	Anna	E01	complete	150	26	176	0.9	5.2	3.5	1.5	1.5	1.6	1.8	216	58	46	13	13	17	17	1	2	8	8	6	5	106	19
419	E. deschauenseei	male	Brasil	Marajó: Santa Cruz do Arari	-49.1689	-0.664182	released	Karla	D01	complete	157	29	186	0.9	6	3.6	1.3	1.5	2	1.6	222	59	54	15	13	16	17	0	0	6	7	6	5	120	19
425	E. deschauenseei	male	Brasil	Marajó: Santa Cruz do Arari	-49.1689	-0.664182	MPEG	unknown	N/A	complete	160	32	192	0.95	6	3.7	1.8	1.8	2.1	1.7	221	53	47	14	15	18	18	2	0	7	8	6	5	128	19
610	E. deschauenseei	male	Brasil	Marajo, Tuiuiu	-49.1336	-0.827392	IB	40786	N/A	complete	133	24.5	157.5	0.8	4.4	3.2	1.2	1.3	1.5	1.3	217	55	46	14	13	17	18	0	1	8	8	6	5	113	19
621	E. deschauenseei	male	Brasil	Marajó, Fz. Severino	-49.1336	-0.827392	IB	15452	N/A	complete	128	24	152	0.85	4.7	3.3	1.3	1.4	1.7	1.3	219	52	46	14	13	17	17	1	1	7	7	6	5	108	19
683	E. deschauenseei	male	Brasil	Marajo, Tuiuiu	-49.1336	-0.827392	IB	18895	N/A	complete	140.5	25	165.5	0.6	4.5	2.8	1.4	1.4	1.7	1.4	216	55	43	13	14	18	19	1	1	7	7	6	5	113	19
404	E. deschauenseei	male	French Guayana	NMNH Vertebrate Zoology Herpetology Collections,497804,11-04-1994	-57.8897	5.66278	ZFMK	65465	N/A	complete	151	28.5	179.5	0.8	5.5	3.6	2.6	1.5	1.8	1.6	222	56	48	14	13	17	16	1	1	7	7	6	5	107	20
624	E. deschauenseei	male	Brasil	Monte Alegro, Curral grande Fz. Bom Jesus	-54.0435	-1.98004	IB	40790	N/A	complete	148.5	24.5	173	0.7	4.6	3	1.5	1.4	1.7	1.5	221	55	45	16	15	19	19	2	1	7	8	6	5	128	21
N/A	E. deschauenseei	unknown	Brasil	Marajó: Santa Cruz do Arari	-49.1689	-0.664182	N/A	N/A	B01	N/A	N/A	N/A	N/A	N/A	N/A	N/A	N/A	N/A	N/A	N/A	N/A	N/A	N/A	N/A	N/A	N/A	N/A	N/A	N/A	N/A	N/A	N/A	N/A	N/A	N/A
N/A	E. deschauenseei	unknown	Brasil	Marajó: Santa Cruz do Arari	-49.1689	-0.664182	N/A	N/A	C01	N/A	N/A	N/A	N/A	N/A	N/A	N/A	N/A	N/A	N/A	N/A	N/A	N/A	N/A	N/A	N/A	N/A	N/A	N/A	N/A	N/A	N/A	N/A	N/A	N/A	N/A
N/A	E. deschauenseei	unknown	Brasil	Marajó: Santa Cruz do Arari	-49.1689	-0.664182	N/A	N/A	A02	N/A	N/A	N/A	N/A	N/A	N/A	N/A	N/A	N/A	N/A	N/A	N/A	N/A	N/A	N/A	N/A	N/A	N/A	N/A	N/A	N/A	N/A	N/A	N/A	N/A	N/A
N/A	E. deschauenseei	unknown	Brasil	Marajó: Santa Cruz do Arari	-49.1689	-0.664182	N/A	N/A	B02	N/A	N/A	N/A	N/A	N/A	N/A	N/A	N/A	N/A	N/A	N/A	N/A	N/A	N/A	N/A	N/A	N/A	N/A	N/A	N/A	N/A	N/A	N/A	N/A	N/A	N/A
N/A	E. deschauenseei	unknown	Brasil	Marajó: Santa Cruz do Arari	-49.1689	-0.664182	N/A	N/A	C02	N/A	N/A	N/A	N/A	N/A	N/A	N/A	N/A	N/A	N/A	N/A	N/A	N/A	N/A	N/A	N/A	N/A	N/A	N/A	N/A	N/A	N/A	N/A	N/A	N/A	N/A
N/A	E. deschauenseei	unknown	Brasil	Marajó: Santa Cruz do Arari	-49.1689	-0.664182	N/A	N/A	D02	N/A	N/A	N/A	N/A	N/A	N/A	N/A	N/A	N/A	N/A	N/A	N/A	N/A	N/A	N/A	N/A	N/A	N/A	N/A	N/A	N/A	N/A	N/A	N/A	N/A	N/A
N/A	E. deschauenseei	unknown	Brasil	Marajó: Santa Cruz do Arari	-49.1689	-0.664182	N/A	N/A	E02	N/A	N/A	N/A	N/A	N/A	N/A	N/A	N/A	N/A	N/A	N/A	N/A	N/A	N/A	N/A	N/A	N/A	N/A	N/A	N/A	N/A	N/A	N/A	N/A	N/A	N/A
N/A	E. deschauenseei	unknown	Brasil	Marajó: Santa Cruz do Arari	-49.1689	-0.664182	N/A	N/A	des_01_1 (RAPD)	N/A	N/A	N/A	N/A	N/A	N/A	N/A	N/A	N/A	N/A	N/A	N/A	N/A	N/A	N/A	N/A	N/A	N/A	N/A	N/A	N/A	N/A	N/A	N/A	N/A	N/A
226	E. murinus	female	Peru	Iquitos	-73.2363	-3.77009	AMNH	53112	N/A	ganz	172	20	192	0.2	6	3.9	1.5	1.6	1.85	1.1	245	63	59	16	17	23	21	8	9	8	8	5	4	91	9
312	E. murinus	female	Peru	Iquitos	-73.2363	-3.77009	SMF	59686	N/A	head, skin	219	29	248	0.3	7.2	4.5	1.85	1.9	1.9	1.2	247	65	62	17	17	20	20	8	6	8	8	6	4	87	9
314	E. murinus	female	Peru	Iquitos	-73.2363	-3.77009	SMF	59685	N/A	head, skin	262	35	297	0.3	10.1	6.4	2.5	2.3	2.5	1.6	249	64	59	16	16	22	22	9	9	8	8	5	4	84	9
738	E. murinus	female	Brasil	Barretos	-48.4628	-20.4637	IB	22752	N/A	head, skin, tail	224	34	258	0.4	7.8	5	2.1	2.25	2.3	1.9	249	69	62	17	18	22	22	6	6	8	8	5	4	120	10
739	E. murinus	female	Brasil	Bauru	-48.815	-22.2517	IB	21828	N/A	head, skin, tail	214	31.5	245.5	0.5	7.9	5.2	2.3	2.1	2.5	2	252	70	63	15	17	21	22	6	6	8	7	6	4	111	10
758	E. murinus	female	Brasil	Indiapora, Rio Grande	-50.3063	-19.9911	IB	42111	N/A	head, skin, tail	200	29	229	0.4	6.7	4.4	1.9	1.8	2.2	1.6	243	67	65	16	15	20	22	4	4	5	6	8	4	119	10
759	E. murinus	female	Brasil	Indiapora, Rio Grande	-50.3063	-19.9911	IB	42082	N/A	ganz	129.5	21	150.5	0.25	4.9	2.8	1.4	1.2	1.35	1	252	69	66	16	16	20	22	5	5	8	7	6	4	104	10
760	E. murinus	female	Brasil	Lussanuira, estacao	-46.4373	-23.7887	IB	14302	N/A	head, skin, tail	220.5	42	262.5	0.6	9.9	6.1	2.8	2.6	2.1	1.9	251	63	63	17	17	23	21	6	6	7	8	7	4	136	10
100	E. murinus	female	Colombia	Leticia	-69.8758	-4.42205	CM	61619	N/A	skin, ckeleton	289	38	327	0.4	9	6	2.2	2.1	2.5	1.6	248	61	66	16	17	21	20	9	9	8	8	5	4	109	11
218	E. murinus	female	Brasil	Barra do Tapirape 10°39'S 50°36'W	-50.6	-10.65	AMNH	93558	N/A	complete	177	27.5	204.5	0.4	6.5	5.2	1.9	1.8	2.1	1.3	228	65	66	15	15	19	20	7	6	7	7	5	4	132	12
707	E. murinus	female	Brasil	Nova Adradina	-53.3713	-22.2326	IB	19885	N/A	head, skin, tail	294	43	337	0.5	9.8	5.8	2.9	2.5	2.2	2.5	251	66	62	16	16	23	21	6	6	7	8	6	4	126	12
711	E. murinus	female	Brasil	Itaum	-55.136	-21.9178	IB	19646	N/A	head, skin, tail	158	24.5	182.5	0.3	6.1	4.1	1.7	2.6	1.7	1.2	245	69	65	15	16	23	22	6	7	8	7	6	4	117	12
714	E. murinus	female	Brasil	Cabeiceira do Apu	-55.5188	-22.1088	IB	18760	N/A	complete	148	22	170	0.2	6.2	3.9	1.5	1.6	1.7	1.2	249	71	66	17	17	22	23	7	6	8	7	5	4	131	12
715	E. murinus	female	Brasil	Pataguacu	-52.4304	-21.6833	IB	27665	N/A	head, skin, tail	275	44	319	0.3	9.2	6.4	2.8	2.6	2.5	2.4	251	78	62	16	16	23	24	7	8	9	7	7	4	140	12
717	E. murinus	female	Brasil	Nova Andradina	-53.3713	-22.2326	IB	19795	N/A	complete	140	23.5	163.5	0.3	5.4	4.2	1.5	1.6	1.8	1.1	152	72	66	16	17	22	21	8	8	8	8	5	4	137	12
720	E. murinus	female	Brasil	Serrito	-54.0629	-23.5615	IB	19699	N/A	complete	152	23.5	185.5	0.3	5.8	3.9	1.7	1.6	1.9	1.3	250	69	65	17	16	24	23	6	8	7	7	5	4	139	12
724	E. murinus	female	Brasil	Porto Esperanza	-57.4518	-19.6127	IB	7489	N/A	complete	183	30.5	213.5	0.4	7	4.6	1.9	1.8	2.2	1.3	245	71	63	16	15	24	22	6	7	8	8	5	4	148	12
732	E. murinus	female	Brasil	Nova Andradina	-53.3713	-22.2326	IB	20377	N/A	complete	130.5	21	151.5	0.2	5.3	3.5	1.5	1.4	1.6	1.2	250	72	65	17	17	22	23	7	7	8	8	8	4	137	12
440	E. murinus	female	Brasil	Belem, Embrapa	-43.0544	-3.98833	MPEG	16816	N/A	complete	195	24	219	0.4	5.6	3.8	1.8	1.5	1.7	1.1	250	66	63	16	16	21	22	8	8	7	7	6	4	113	13
318	E. murinus	female	Surinam	unknown	-55.113	5.79482	SMF	16886	N/A	complete	328.5	51.5	370	0.65	12	7.3	2.8	2.6	2.3	2	253	66	64	16	16	21	21	6	5	7	7	6	4	115	14
319	E. murinus	female	Surinam	Paramaribo	-55.113	5.79482	SMF	16887	N/A	complete	304	43	347	0.6	9	5.3	2.2	2	2.1	1.1	249	69	61	15	15	18	19	5	4	8	7	5	4	132	14
345	E. murinus	female	Brit. Guyana	Penal Settlement, Mazaruni	-58.65	6.4	BMNH	1934.11.1.14	N/A	complete	239	36	275	0.6	9	5.2	2	1.9	2	1.9	249	64	60	17	16	20	20	8	7	7	7	4	4	102	14
371	E. murinus	female	Brit. Guyana	unknown	-58.65	6.4	MTKDD	21991	N/A	complete	192	30.5	229.5	0.5	7.7	4.7	2.2	1.7	2.1	1.4	246	66	61	15	16	22	20	5	5	7	7	5	4	108	14
690	E. murinus	female	Brasil	Guajara Mirim	-65.3333	-10.8333	IB	17856	N/A	complete	141	23.5	164.5	0.2	5.3	3.6	1.6	1.4	1.6	1.2	248	70	74	18	17	23	23	8	8	7	8	5	4	137	15
258	E. murinus	female	Brasil	Marajo - xxxSoure	-48.4976	-0.732457	ANSP	20892	N/A	head, skin, tail	363	59	422	0.9	11.7	7.3	3.4	3.2	3.5	2.8	245	75	63	16	16	20	21	5	5	8	7	6	4	120	17
429	E. murinus	female	Brasil	xxxCacoul. Maragem Esquerda do Rio Tocantins. Tucurui	-49.6161	-2.93705	MPEG	16691	N/A	complete	169	30	199	0.4	6.3	4.5	1.9	1.8	2	1.4	244	69	68	15	16	22	22	9	8	9	8	4	4	126	17
430	E. murinus	female	Brasil	Area da FCAP, Av. Perimentral, Belem	-48.4514	-1.47053	MPEG	18483	N/A	complete	165	27	192	0.3	6	3.7	1.5	1.5	1.6	1	257	72	69	18	17	21	22	5	5	8	8	7	4	131	17
431	E. murinus	female	Brasil	Area da FCAP, Av. Perimentral, Belem	-48.4514	-1.47053	MPEG	18511	N/A	complete	156	29	185	0.4	6.4	4.3	1.7	1.8	1.8	1.3	252	70	64	16	16	21	21	4	4	8	8	6	4	129	17
433	E. murinus	female	Brasil	Marajo, Lagoa Guarajak	-48.4936	-1.43556	MPEG	unknown	N/A	complete	284	44	328	0.7	9.3	6	2.8	2.5	2.9	2	245	67	64	15	17	21	21	7	7	7	8	5	4	123	17
443	E. murinus	female	Brasil	Benevides, Facenda morelandia, Estr. da ......B2..	-48.3183	-1.32445	MPEG	16378	N/A	complete	170	28	198	0.4	6.2	3.9	1.6	1.7	1.7	1.1	252	71	65	18	18	23	22	9	8	7	7	6	4	137	17
687	E. murinus	female	Brasil	Marajo - xxxCaviana 00°10'N 50°10'W;	-50.1687	0.112816	IB	18151	N/A	complete	176	31	207	0.45	6.7	4.6	2.2	1.7	1.8	1.4	245	74	65	16	16	22	21	7	6	7	7	7	4	139	17
767	E. murinus	female	Brasil	Boa Vista, Fz. Emeralinda	-60.7944	2.85166	IB	24036	N/A	head, skin, tail	286	46.5	332.5	0.5	10.3	7.2	3.2	2.6	2.6	1.8	254	70	63	16	16	20	21	5	4	7	7	5	4	128	17
743	E. murinus	male	Brasil	Miracema	-42.1954	-21.4201	IB	20672	N/A	head, skin, tail	207	37.5	244.5	1.2	6.9	3.8	2.1	1.9	2	2	249	62	66	16	16	20	22	5	6	8	7	5	4	124	8
28	E. murinus	male	Peru	Rio Curanja / Balta	-72.1905	-3.62607	LSUMZ	26839	N/A	skin	216	39.5	255.5	1	7	4.9	2	1.9	2.3	1.8	246	64	61	15	16	19	20	8	9	7	7	5	4	84	9
31	E. murinus	male	Peru	unknown	-72.1905	-3.62607	LSUMZ	39404	N/A	head, skin, tail	213	47	260	0.9	6	4.2	1.9	1.8	2.5	1.8	251	76	66	16	15	22	23	5	6	7	7	6	4	135	9
39	E. murinus	male	Peru	Rio Curaja / Balta	-72.1905	-3.62607	LSUMZ	14585	N/A	head, skin, tail	223	35.5	258.5	0.95	8	5.3	2	1.9	2.6	1.7	245	61	63	17	17	23	22	9	7	7	8	5	4	81	9
217	E. murinus	male	Peru	Santa Rosa (Yurimaguas)	-73.1065	-3.06292	AMNH	53489	N/A	complete	184	26.5	210.5	0.5	6.3	3.5	1.7	1.5	1.8	1.3	247	62	63	17	17	23	21	8	6	8	8	6	4	128	9
313	E. murinus	male	Peru	Iquitos	-73.2363	-3.77009	SMF	59687	N/A	head, skin	214	35	249	0.8	7.2	4.9	1.8	1.9	1.9	1.5	247	63	59	17	16	20	20	8	6	8	8	5	4	70	9
64	E. murinus	male	Paraguay	Asuncion	-56.3	-23.8167	FMNH	9504	N/A	complete	155	33.5	188.5	0.8	7	4.5	1.6	1.8	1.7	1.8	251	71	62	15	15	22	21	7	7	5	6	7	4	126	10
734	E. murinus	male	Brasil	Adamantina	-51.0949	-21.6732	IB	51229	N/A	complete	164	35	199	0.95	5.9	3.5	1.6	1.6	1.85	1.8	246	71	63	15	15	23	22	5	5	7	7	5	4	124	10
735	E. murinus	male	Brasil	Altair	-49.0367	-20.5204	IB	21067	N/A	head, skin, tail	246	43.5	289.5	1	8	5.7	2.1	2.3	2.4	2.4	253	68	64	15	15	20	22	5	5	7	6	8	4	101	10
737	E. murinus	male	Brasil	Araraquara	-48.2327	-21.816	IB	51232	N/A	complete	135	22.5	155.5	0.5	5.3	3.3	1.5	1.6	1.5	1.5	248	65	62	16	17	22	20	5	5	8	8	5	4	119	10
741	E. murinus	male	Brasil	Monteiras	-45.8412	-22.9685	IB	15445	N/A	complete	224	45.5	269.5	1	6.2	4.9	2	2	2.4	2.6	246	67	62	18	17	22	22	4	6	7	7	8	4	112	10
744	E. murinus	male	Brasil	Delta estacao (Uberaba)	-47.8176	-19.9266	IB	28592	N/A	head, skin, tail	199	39	238	0.9	6.8	4.4	1.8	1.9	2.1	2.4	256	69	65	16	16	21	21	6	6	9	8	7	4	124	10
753	E. murinus	male	Brasil	Indiapora, UHE, Agua Vermehla; Rio Grande	-50.3063	-19.9911	IB	42163	N/A	head, skin, tail	226	40	266	1	7.1	5	2	1.9	2.3	2.2	247	66	65	17	17	23	21	7	7	8	8	5	4	127	10
755	E. murinus	male	Brasil	Orlandia	-47.8641	-20.7689	IB	276	N/A	complete	187.5	38	225.5	1.2	6.5	4.2	1.9	1.9	2.1	1.7	246	69	64	17	16	21	23	7	5	8	7	7	4	120	10
756	E. murinus	male	Brasil	Orlandia	-47.8641	-20.7689	IB	925	N/A	skin	236	40	276	0.95	6.2	4.8	1.7	1.7	2.3	2.1	251	64	67	15	15	22	20	6	5	8	7	5	4	130	10
186	E. murinus	male	Venezuela	lower Rio Baria 90m	-66.4787	1.35804	AMNH	127827	N/A	head, skin, tail	197	38.5	245.5	0.7	7.7	5.1	2	1.9	2.5	1.9	252	69	59	16	17	20	20	3	4	7	7	5	4	116	11
188	E. murinus	male	Venezuela	Neblina Base Camp on Rio Mawarinuma 140m	-66.1667	0.833333	AMNH	127829	N/A	head, skin, tail	231	46	277	0.95	7.9	5.8	2.2	2.1	2.6	2	254	66	63	16	16	20	20	4	5	6	6	5	4	104	11
688	E. murinus	male	Brasil	Brilhante	-55.0425	-15.9759	IB	16117	N/A	complete	220.5	40	260.5	1	6.8	3.6	2	1.8	2.3	2	248	68	65	16	16	20	22	6	9	7	7	5	4	135	12
704	E. murinus	male	Brasil	Xingu, Parque National do	-53.235	-11.253	IB	34091	N/A	complete	211	41	252	1.05	7.5	4.8	2	1.9	2.2	1.8	251	66	64	17	17	23	22	5	6	7	8	5	4	127	12
706	E. murinus	male	Brasil	Rio Juruena	-58.0811	-7.4564	IB	32950	N/A	head, skin, tail	227	43.5	270.5	1.05	7	5	2.1	2	2.5	2.2	257	72	66	17	17	22	22	8	7	7	7	5	4	124	12
708	E. murinus	male	Brasil	Jupiá	-51.6236	-20.7741	IB	21986	N/A	head, skin, tail	241	51	292	1.1	8	4.6	2.3	2.1	2.6	2.5	247	69	67	15	16	22	25	5	6	7	9	5	4	140	12
722	E. murinus	male	Brasil	Ribas do Rio Pardo	-53.7701	-20.4286	IB	16106	N/A	head, skin, tail	146	30	176	0.5	5.7	3.4	1.6	1.4	1.7	1.3	245	71	65	17	17	23	21	5	5	8	7	6	4	119	12
731	E. murinus	male	Brasil	Falmeira	-55.5	-16.05	IB	20987	N/A	complete	138	24	162	0.45	5.4	3.2	1.3	1.3	1.6	1.4	246	69	63	15	15	23	22	5	7	7	7	5	4	146	12
733	E. murinus	male	Brasil	Nova Andradina	-53.3713	-22.2326	IB	20507	N/A	complete	192	34	226	0.6	6.3	4	1.8	1.8	2	1.8	254	70	67	15	16	21	23	5	6	6	8	5	4	132	12
692	E. murinus	male	Brasil	Imperatriz (Ribeiraozinho)	-47.4936	-5.59315	IB	53461	N/A	head, skin	245	43	288	1.1	6.8	4.9	2	2	2.6	2.4	254	68	64	16	16	23	23	6	5	7	7	5	4	131	13
59	E. murinus	male	Brit. Guyana	Buxton	-58.0692	6.69674	FMNH	26654	N/A	complete	158.5	30	188.5	0.7	6.5	3.6	1.5	1.5	1.9	1.5	251	68	61	15	14	19	20	5	4	7	7	9	4	112	14
261	E. murinus	male	Surinam	10 km out of Paramaibo on Zanderij- Paramaibo-Road	-55.1847	5.49712	MCZ	149585	N/A	complete	145	21.5	166.5	0.5	4.9	3.5	1.4	1.3	1.6	1.3	248	66	60	16	17	20	20	6	4	8	7	5	4	107	14
346	E. murinus	male	Surinam	Paramaibo	-55.113	5.79482	BMNH	1946.4.4.11	N/A	complete	203	38	241	0.9	6.6	4.2	2	1.8	2	1.8	250	69	60	16	15	19	19	5	6	6	7	5	4	105	14
428	E. murinus	male	Brasil	Estacao Cientifica Ferreira Penna/Floresta (s. B2)	-51.434	-1.79231	MPEG	N/A	N/A	complete	236	48	284	1.15	6.2	4.4	2.2	2	2.3	2.4	251	69	63	17	16	21	21	5	4	8	10	6	4	131	17
432	E. murinus	male	Brasil	Area da FCAP, Av. Perimentral, Belem	-48.4514	-1.47053	MPEG	18737	N/A	complete	224	46	270	1	8	5.9	2	1.8	2.3	2.1	254	72	58	16	16	20	22	6	6	9	8	5	4	123	17
691	E. murinus	male	Brasil	Belem	-48.4514	-1.47053	IB	14828	N/A	complete	198	47	245	0.9	7.3	4.9	2	2	2.1	1.8	246	70	66	17	17	21	21	6	6	7	8	6	4	125	17
761	E. murinus	male	Brasil	Macapa	-51.0376	0.0783368	IB	28777	N/A	head, skin, tail	223.5	50	273.5	1	8.6	4.8	2.6	2.2	2.7	2.3	250	69	64	16	15	21	20	8	8	8	7	5	4	106	17
N/A	E. murinus	male	Brasil	Estacao Cientifica Ferreira Penna/Floresta Nacional de Caxiuana Melgaco, Parä	unknown	unknown	MPEG	N/A	A01	unknown	N/A	N/A	N/A	N/A	N/A	N/A	N/A	N/A	N/A	N/A	N/A	N/A	N/A	N/A	N/A	N/A	N/A	N/A	N/A	N/A	N/A	N/A	N/A	N/A	N/A
N/A	E.murinus	unknown	Brasil	Marajó: Santa Cruz do Arari	-49.1689	-0.664182	N/A	N/A	H01	N/A	N/A	N/A	N/A	N/A	N/A	N/A	N/A	N/A	N/A	N/A	N/A	N/A	N/A	N/A	N/A	N/A	N/A	N/A	N/A	N/A	N/A	N/A	N/A	N/A	N/A
463	E. notaeus	female	Paraguay	Yacyreta	-56.7246	-27.459	MNHNP	6900 PB 1	N/A	complete	164.5	26	190.5	0.5	5.9	3.6	1.9	1.6	2.2	1.7	-99	52	46	13	15	17	17	1	1	7	6	7	5	141	2
464	E. notaeus	female	Paraguay	Yacyreta	-56.7246	-27.459	MNHNP	6910 PB 2	N/A	complete	177.5	25.5	203	0.4	6	3.3	1.8	1.8	2.1	1.7	-99	52	49	13	14	17	18	1	1	6	7	6	5	152	2
465	E. notaeus	female	Paraguay	Yacyreta	-56.7246	-27.459	MNHNP	6934 PB 3	N/A	complete	139	21	160	0.35	5.3	2.9	1.5	1.55	2.1	1.3	-99	50	46	14	13	17	17	1	1	7	6	6	5	136	2
467	E. notaeus	female	Paraguay	Yacyreta	-56.7246	-27.459	MNHNP	6924 PB 5	N/A	complete	160	26	186	0.45	5.7	3.2	1.8	1.7	2.2	1.7	-99	57	46	15	15	18	19	2	2	8	9	6	5	154	2
476	E. notaeus	female	Paraguay	Yacyreta	-56.7246	-27.459	MNHNP	6935 PB 15	N/A	complete	180	26.5	206.5	0.5	6.5	4	1.9	1.9	2.2	1.8	-99	55	46	14	14	18	18	1	1	7	6	5	5	139	2
477	E. notaeus	female	Paraguay	Yacyreta	-56.7246	-27.459	MNHNP	6864 PB 16	N/A	complete	177.5	23.5	201	0.4	6.2	4.1	1.8	1.7	2.2	1.5	-99	53	47	14	16	18	17	1	1	6	7	3	5	139	2
479	E. notaeus	female	Paraguay	Yacyreta	-56.7246	-27.459	MNHNP	6907 PB 18	N/A	complete	162	25.5	187.5	0.4	5.7	3.4	1.8	1.6	2.2	1.5	-99	52	46	15	16	20	18	1	1	7	6	5	5	140	2
480	E. notaeus	female	Paraguay	Yacyreta	-56.7246	-27.459	MNHNP	6921 PB 19	N/A	complete	166	26.6	192.6	0.45	6	3.6	1.9	1.8	2.5	1.6	-99	58	46	15	15	17	19	1	1	8	7	6	5	131	2
481	E. notaeus	female	Paraguay	Yacyreta	-56.7246	-27.459	MNHNP	6905 PB 20	N/A	complete	135	19	154	0.4	4.8	2.6	1.5	1.3	1.65	1.15	-99	46	45	13	13	17	18	1	1	7	7	7	5	153	2
843	E. notaeus	female	Paraguay	Yacyreta	-56.7246	-27.459	MNHNP	6895 PB 22	N/A	complete	161.5	25	186.5	0.3	6.1	4.3	1.8	1.8	2	1.45	-99	53	49	14	14	19	18	2	2	6	7	5	5	134	2
484	E. notaeus	female	Paraguay	Yacyreta	-56.7246	-27.459	MNHNP	6936 PB 23	N/A	complete	159	23.5	182.5	0.35	5.8	3.3	1.8	1.7	2.15	1.5	-99	57	45	14	14	19	18	1	2	6	8	6	5	142	2
489	E. notaeus	female	Paraguay	Yacyreta	-56.7246	-27.459	MNHNP	6873 PB 29	N/A	complete	147.5	23.5	171	0.4	5.4	3.6	1.6	1.6	1.8	1.6	-99	55	48	14	14	19	17	1	1	7	7	5	5	136	2
496	E. notaeus	female	Paraguay	Yacyreta	-56.7246	-27.459	MNHNP	6928 PB 39	N/A	complete	180	28	208	0.3	6.3	4	1.9	1.8	2.2	1.7	-99	57	46	14	14	18	17	1	1	7	7	6	5	154	2
497	E. notaeus	female	Paraguay	Yacyreta	-56.7246	-27.459	MNHNP	6876 PB 41	N/A	complete	163.5	23	186.5	0.45	5.7	3.6	1.7	1.6	2	1.6	-99	52	45	16	15	17	17	2	2	7	7	5	5	129	2
498	E. notaeus	female	Paraguay	Yacyreta	-56.7246	-27.459	MNHNP	6880 PB 42	N/A	complete	157.8	23.8	181.6	0.4	6.9	3.9	1.7	1.6	2	1.4	-99	53	50	15	15	19	18	1	1	7	8	5	5	142	2
505	E. notaeus	female	Paraguay	Yacyreta	-56.7246	-27.459	MNHNP	6845 PB 50	N/A	complete	131.5	21.5	153	0.2	4.8	3.1	1.6	1.5	1.7	1.2	225	59	45	13	13	17	16	1	1	6	6	5	5	141	2
511	E. notaeus	female	Paraguay	Yacyreta	-56.7246	-27.459	MNHNP	6896 PB 57	N/A	complete	159.5	24	183.5	0.3	5.6	3.6	1.7	1.7	2	1.7	-99	54	48	15	15	17	17	4	2	7	7	6	5	127	2
512	E. notaeus	female	Paraguay	Yacyreta	-56.7246	-27.459	MNHNP	6848 PB 59	N/A	complete	138	20.5	158.5	0.4	4.9	2.8	1.4	1.5	1.9	1.5	230	60	47	14	14	18	18	1	1	7	7	5	5	153	2
516	E. notaeus	female	Paraguay	Yacyreta	-56.7246	-27.459	MNHNP	6923 PB 63	N/A	complete	150	22.5	172.5	0.55	5.8	3.4	1.8	1.7	2	1.5	-99	55	47	14	14	20	18	1	0	7	7	6	5	134	2
517	E. notaeus	female	Paraguay	Yacyreta	-56.7246	-27.459	MNHNP	6899 PB 64	N/A	complete	166.5	25	191.5	0.4	5.9	4	1.9	1.7	2.4	1.6	-99	55	45	13	15	17	17	2	2	9	7	5	5	143	2
519	E. notaeus	female	Paraguay	Yacyreta	-56.7246	-27.459	MNHNP	6892 PB 66	N/A	complete	163	25.5	188.5	0.45	6.4	3.9	1.8	1.7	2.1	2.8	-99	49	46	14	15	18	18	0	1	7	6	6	5	136	2
520	E. notaeus	female	Paraguay	Yacyreta	-56.7246	-27.459	MNHNP	6914 PB 67	N/A	complete	198.5	28.5	227	0.55	7	3.9	2.1	2	2.5	1.9	-99	54	47	15	15	19	19	1	1	6	7	6	5	156	2
521	E. notaeus	female	Paraguay	Yacyreta	-56.7246	-27.459	MNHNP	6901 PB 68	N/A	complete	188.5	26.5	215	0.5	7.1	4.8	1.9	2	2.5	2	-99	57	47	14	14	19	18	1	2	7	6	5	5	135	2
522	E. notaeus	female	Paraguay	Yacyreta	-56.7246	-27.459	MNHNP	6931 PB 69	N/A	complete	186	26	212	0.55	7.3	4.5	1.9	1.9	2.3	1.8	-99	53	46	13	14	17	17	1	1	7	6	6	5	142	2
523	E. notaeus	female	Paraguay	Yacyreta	-56.7246	-27.459	MNHNP	6861 PB 70	N/A	complete	154	21	175	0.35	5.4	3.4	1.5	1.5	2	1.5	-99	55	46	14	13	18	16	1	0	7	8	6	5	152	2
524	E. notaeus	female	Paraguay	Yacyreta	-56.7246	-27.459	MNHNP	6863 PB 71	N/A	complete	178.5	28	206.5	0.5	6.3	4.4	1.8	1.9	2.3	1.8	-99	54	47	14	14	17	17	1	1	6	7	5	5	127	2
525	E. notaeus	female	Paraguay	Yacyreta	-56.7246	-27.459	MNHNP	6854 PB 72	N/A	complete	180	27.5	207.5	0.4	6.9	4.2	2	1.7	2.5	1.7	226	54	46	14	14	19	19	1	1	7	9	6	5	137	2
526	E. notaeus	female	Paraguay	Yacyreta	-56.7246	-27.459	MNHNP	6860 PB 73	N/A	complete	170	26.5	196.5	0.4	6.4	3.7	1.8	1.6	2.3	1.9	-99	51	48	14	14	17	17	2	1	6	7	6	5	138	2
527	E. notaeus	female	Paraguay	Yacyreta	-56.7246	-27.459	MNHNP	6856 PB 74	N/A	complete	145.5	20.2	165.7	0.4	5.6	3.5	1.7	1.5	1.9	1.6	-99	55	50	13	14	16	17	1	2	6	7	6	5	123	2
528	E. notaeus	female	Paraguay	Yacyreta	-56.7246	-27.459	MNHNP	6927 PB 75	N/A	complete	172	28	200	0.45	6.1	3.9	1.8	1.7	2.3	1.8	-99	58	48	14	15	17	18	1	1	9	8	5	5	127	2
530	E. notaeus	female	Paraguay	Yacyreta	-56.7246	-27.459	MNHNP	6852 PB 77	N/A	complete	161	25.5	186.5	0.5	5.7	3.1	1.7	1.7	2.1	1.5	221	53	45	13	14	17	18	2	2	8	8	5	5	129	2
532	E. notaeus	female	Paraguay	Yacyreta	-56.7246	-27.459	MNHNP	6853 PB 79	N/A	complete	145	23.5	168.5	0.4	5.6	3.8	1.6	1.55	2.3	1.6	226	56	48	14	14	17	17	1	1	8	6	6	5	144	2
534	E. notaeus	female	Paraguay	Yacyreta	-56.7246	-27.459	MNHNP	6929 PB 81	N/A	complete	176	27	203	0.55	6.6	4.5	1.9	1.9	2.3	2	-99	54	46	15	14	18	18	1	1	7	6	5	5	152	2
535	E. notaeus	female	Paraguay	Yacyreta	-56.7246	-27.459	MNHNP	6925 PB 82	N/A	complete	182	28.5	210.5	0.35	6.5	4.3	1.7	1.8	2.8	2.1	-99	53	45	14	15	17	18	1	2	8	7	6	5	144	2
536	E. notaeus	female	Paraguay	Yacyreta	-56.7246	-27.459	MNHNP	6850 PB 83	N/A	complete	180	25.5	205.5	0.6	6.1	4.1	1.8	1.75	2.1	1.6	227	55	46	14	16	20	20	2	1	7	8	6	5	139	2
540	E. notaeus	female	Paraguay	Yacyreta	-56.7246	-27.459	MNHNP	6857 PB 88	N/A	complete	143	19.8	162.8	0.3	5	3.6	1.4	1.4	2.1	1.65	-99	55	45	14	14	17	18	1	1	6	6	5	5	127	2
541	E. notaeus	female	Paraguay	Yacyreta	-56.7246	-27.459	MNHNP	6862 PB 89	N/A	complete	172.5	27	199.5	0.4	6.5	4.3	1.9	1.9	2.4	1.8	-99	50	46	15	15	17	17	1	2	7	7	5	5	134	2
331	E. notaeus	female	Paraguay	Puerto Sastre	-57.9697	-22.1386	ZSM	N/A	N/A	complete	186	26	212	0.3	6	3.8	1.6	1.4	1.9	1.5	228	58	46	14	14	17	17	0	0	6	6	6	5	124	3
332	E. notaeus	female	Paraguay	Puerto Sastre	-57.9697	-22.1386	ZSM	N/A	N/A	complete	249.5	35.5	285	0.6	8.5	5.5	2.1	2.3	2.9	2.1	226	57	45	14	14	17	17	1	1	8	8	6	5	142	3
347	E. notaeus	female	Paraguay	Puerto Sastre	-57.9697	-22.1386	BMNH	1950.1.5.90	N/A	complete	182	30.5	212.5	0.4	7.5	4.8	1.8	1.8	2.5	1.9	223	55	50	14	14	18	17	1	1	7	7	5	5	132	3
542	E. notaeus	female	Paraguay	Yacyreta	-56.7246	-27.459	MNHNP	6885 Z 11580	N/A	complete	170.5	25.5	196	0.45	6.3	4.5	1.7	1.8	2.1	1.7	-99	53	46	14	14	17	18	1	0	6	6	5	5	128	3
552	E. notaeus	female	Paraguay	Yacyreta	-56.7246	-27.459	MNHNP	6952 Z 11303	N/A	complete	131.5	20.5	152	0.35	5	3.3	1.5	1.5	1.7	1.2	230	56	49	16	14	19	18	4	3	7	6	5	5	140	3
570	E. notaeus	female	Paraguay	Yacyreta	-56.7246	-27.459	MNHNP	6939 Z 11703	N/A	complete	224	33.3	257.3	0.55	8.2	5.9	2.4	2.2	2.9	1.8	231	57	49	15	14	16	17	1	1	7	7	4	5	136	3
571	E. notaeus	female	Paraguay	Yacyreta	-56.7246	-27.459	MNHNP	6957 Z 11740	N/A	complete	208	31.5	239.5	0.4	6.8	5	2	1.9	2.4	2	230	57	49	15	15	17	18	1	0	7	7	6	5	132	3
572	E. notaeus	female	Paraguay	Yacyreta	-56.7246	-27.459	MNHNP	6959 Z 11747	N/A	complete	199.5	30.5	230	0.6	7	4.9	2	2	2.7	2	221	57	48	13	14	17	17	2	2	8	7	5	5	139	3
573	E. notaeus	female	Paraguay	Yacyreta	-56.7246	-27.459	MNHNP	6938 Z 11748	N/A	complete	215	33.5	248.5	0.6	7.1	5	2	1.9	2.8	2.3	228	54	47	14	13	16	17	1	1	5	7	5	5	133	3
574	E. notaeus	female	Paraguay	Yacyreta	-56.7246	-27.459	MNHNP	6956 CM Field 76310	N/A	complete	196.5	29.5	226	0.65	6.3	4.9	1.7	1.8	2.5	2.1	229	56	47	14	14	17	18	1	1	7	7	3	5	121	3
577	E. notaeus	female	Paraguay	Asuncion, Bahia de As.	-57.6147	-25.2687	MNHNP	6940 A.L.A. 2061	N/A	complete	268	38.5	306.5	0.6	9.2	7.4	2.2	2.6	3.4	2.3	231	56	48	14	16	18	18	3	2	7	7	6	5	148	3
578	E. notaeus	female	Paraguay	Estancia Dona, 1k SE Puerto Caballo	-58.2	-20.2	MNHNP	3885 MSB Field 1425	N/A	complete	163	27.5	190.5	0.4	6.1	5	1.6	1.8	2	1.7	229	57	49	14	13	17	17	1	2	7	8	6	5	166	3
579	E. notaeus	female	Paraguay	Laguna Gral. Diaz	-59.0167	-22.3	MNHNP	3896 MSB Field 1490	N/A	complete	164	26	190	0.4	5.8	4	1.75	1.65	2.3	1.6	224	52	48	13	13	17	18	1	1	7	8	6	5	167	3
583	E. notaeus	female	Paraguay	unknown	-57.9244	-21.2833	MNHNP	N/A	N/A	complete	220	36	256	0.6	7.8	5.5	2.2	2.2	3.1	2.1	222	57	46	13	14	16	17	1	2	7	7	5	5	121	3
588	E. notaeus	female	Paraguay	unknown	-57.9244	-21.2833	IB	1171	N/A	complete	132.5	21.5	154	0.4	5	3.1	1.3	1.4	1.7	1.2	222	56	49	15	16	20	18	2	1	9	8	4	5	171	3
55	E. notaeus	female	Brasil	Aquidaunana	-55.8754	-20.3664	FMNH	9196	N/A	complete	158.5	26	174.5	0.45	5.7	3.5	1.5	1.7	2.4	1.3	223	53	46	14	14	17	18	3	2	7	8	5	5	140	4
592	E. notaeus	female	Brasil	Carandazal	-57.9296	-21.5404	IB	9251	N/A	head, skin, tail	253	39.5	292.5	0.55	7.9	5.4	2.4	2.2	2.8	2.1	230	58	47	15	14	18	18	2	1	8	8	4	5	161	4
602	E. notaeus	female	Brasil	Bauru	-48.815	-22.2517	IB	17424	N/A	head, skin, tail	230	33.5	263.5	0.45	7.9	4.8	2.2	2	3	1.6	224	56	46	15	15	18	19	4	3	8	8	5	5	137	4
330	E. notaeus	female	Argentina	Lapango-Pilcomayo (Gob. Formosa)	-57.653	-25.368	ZSM	167/1929	N/A	complete	168.5	32.5	201	0.05	6.7	4.5	1.8	1.7	2.1	1.8	227	60	45	13	14	17	17	0	0	7	7	5	5	165	6
387	E. notaeus	female	Argentina	Dt. Zool. Ges.	-61.85	-13.5167	ZMH	4409	N/A	complete	231	37.5	268.5	0.6	8.2	5.3	2.5	2.4	4	1.9	221	54	45	13	14	18	15	0	1	6	7	6	5	135	6
328	E. notaeus	female	unknown	Apa.-Bergland (Chaco-Exp.)	-57.5332	-22.2187	ZSM	unknown	N/A	complete	205	31	236	0.45	7	4.5	1.9	2	2.5	1.6	222	55	45	15	15	18	19	1	1	7	8	6	5	157	7
375	E. notaeus	female	unknown	Verm. Aquarium Bremerhaven	-58.8703	-25.8087	MTKDD	10443	N/A	complete	185	28.5	213.5	0.5	6	4.7	1.7	1.8	2	1.8	232	57	43	13	15	17	16	1	1	7	7	6	5	142	7
390	E. notaeus	female	Museo Argentino de Ciencias Naturales 'Bernardino Rivadavia', MACN 39637	unknown	-58.8703	-25.8087	UMB	unknown	N/A	complete	150	22	172	0.4	5	2.8	1.4	1.4	2	1.2	229	57	48	14	14	19	19	2	1	7	7	6	5	123	7
468	E. notaeus	male	Paraguay	Yacyreta	-56.7246	-27.459	MNHNP	6849 PB 7	N/A	complete	145	26	171	1.1	5.3	2.6	2.7	1.5	1.8	2.1	233	51	45	13	14	18	17	1	1	8	7	5	5	144	2
469	E. notaeus	male	Paraguay	Yacyreta	-56.7246	-27.459	MNHNP	6867 PB 8	N/A	complete	153.5	27.5	181	0.9	5.4	2.6	1.7	1.5	1.8	2	-99	54	47	13	14	18	18	2	1	7	7	6	5	143	2
472	E. notaeus	male	Paraguay	Yacyreta	-56.7246	-27.459	MNHNP	6932 PB 11	N/A	complete	138.5	24.5	163	0.8	4.8	2.7	1.9	1.4	1.7	2	-99	51	44	14	13	18	17	1	1	6	6	5	5	141	2
473	E. notaeus	male	Paraguay	Yacyreta	-56.7246	-27.459	MNHNP	6933 PB 12	N/A	complete	143.5	15.2	168.7	0.4	5.6	3.8	1.6	1.5	1.8	1.6	-99	52	46	14	14	18	17	2	1	7	8	6	5	135	2
478	E. notaeus	male	Paraguay	Yacyreta	-56.7246	-27.459	MNHNP	6912 PB 17	N/A	complete	146.5	28	174.5	0.85	5.4	3.7	1.5	1.7	1.8	2.05	-99	56	45	14	13	18	19	1	0	6	6	6	5	142	2
485	E. notaeus	male	Paraguay	Yacyreta	-56.7246	-27.459	MNHNP	6847 PB 24	N/A	complete	136.5	24.5	161	0.85	4.3	3.1	1.4	1.4	1.9	1.7	225	56	49	14	14	19	17	2	1	8	8	5	5	153	2
486	E. notaeus	male	Paraguay	Yacyreta	-56.7246	-27.459	MNHNP	6894 PB 25	N/A	complete	145.5	24.5	170	0.85	5	3	1.4	1.5	1.7	1.7	-99	58	50	14	13	16	17	1	0	7	6	4	5	141	2
487	E. notaeus	male	Paraguay	Yacyreta	-56.7246	-27.459	MNHNP	6937 PB 26	N/A	complete	149	24.5	173.5	0.8	5.3	3.9	1.6	1.6	1.9	1.8	-99	47	45	15	14	20	18	1	1	7	8	5	5	131	2
488	E. notaeus	male	Paraguay	Yacyreta	-56.7246	-27.459	MNHNP	6930 PB 27	N/A	complete	171.5	31.2	202.7	0.9	6.1	4.4	1.8	1.8	2.1	2	-99	58	47	14	16	18	18	3	1	7	5	6	5	141	2
490	E. notaeus	male	Paraguay	Yacyreta	-56.7246	-27.459	MNHNP	6871 PB 30	N/A	complete	162	27	191	0.85	5.8	3.3	1.8	1.9	2.1	1.9	-99	49	47	14	14	18	18	1	1	7	7	6	5	132	2
491	E. notaeus	male	Paraguay	Yacyreta	-56.7246	-27.459	MNHNP	6909 PB 31	N/A	complete	135.5	24	159.5	0.9	4.8	3.1	2	2	1.8	1.75	-99	55	46	14	16	18	19	1	1	7	7	6	5	138	2
493	E. notaeus	male	Paraguay	Yacyreta	-56.7246	-27.459	MNHNP	6869 PB 34	N/A	complete	144	24.5	168.5	0.8	5.4	3.4	1.6	1.5	2	1.9	-99	54	48	14	14	19	17	1	0	7	5	6	5	136	2
494	E. notaeus	male	Paraguay	Yacyreta	-56.7246	-27.459	MNHNP	6898 PB 35	N/A	complete	154	27.5	181.5	0.9	5.4	3.6	1.6	1.65	2.05	2.1	-99	52	47	14	15	17	17	1	1	7	7	6	5	138	2
495	E. notaeus	male	Paraguay	Yacyreta	-56.7246	-27.459	MNHNP	6906 PB 36	N/A	complete	150	26.5	176.5	1	5.5	3.8	1.7	1.6	2.15	1.9	-99	56	46	14	14	17	16	1	1	7	8	6	5	144	2
503	E. notaeus	male	Paraguay	Yacyreta	-56.7246	-27.459	MNHNP	6864 PB 48	N/A	complete	138	24.5	162.5	0.8	4.8	2.2	1.4	1.4	1.6	1.05	227	57	48	12	13	17	17	1	1	6	7	6	5	150	2
507	E. notaeus	male	Paraguay	Yacyreta	-56.7246	-27.459	MNHNP	6877 PB 52	N/A	complete	174.5	29.5	204	1	6.8	3.1	1.7	1.7	2.05	2.2	-99	53	44	14	18	18	18	1	7	6	5	6	5	146	2
508	E. notaeus	male	Paraguay	Yacyreta	-56.7246	-27.459	MNHNP	6913 PB 53	N/A	complete	159	28	187	0.85	5.6	3.7	1.7	1.7	2.2	2.2	-99	59	46	14	14	16	17	1	1	6	6	6	5	132	2
510	E. notaeus	male	Paraguay	Yacyreta	-56.7246	-27.459	MNHNP	6872 PB 56	N/A	complete	147.5	26.5	174	0.9	5.2	2.9	1.6	1.6	2	1.6	-99	55	44	14	15	19	18	1	3	7	8	5	5	138	2
514	E. notaeus	male	Paraguay	Yacyreta	-56.7246	-27.459	MNHNP	6923 PB 61	N/A	complete	145	26	171	0.8	5.2	3.2	1.6	1.6	1.75	1.9	-99	55	48	14	14	18	18	1	1	6	6	5	5	155	2
529	E. notaeus	male	Paraguay	Yacyreta	-56.7246	-27.459	MNHNP	6911 PB 76	N/A	complete	129	23	152	0.8	4.8	2.8	1.5	1.5	1.8	1.8	-99	53	48	14	14	18	18	1	1	7	7	5	5	135	2
533	E. notaeus	male	Paraguay	Yacyreta	-56.7246	-27.459	MNHNP	6858 PB 80	N/A	complete	131.5	23	154.5	0.75	5	3.5	1.5	1.5	2	1.8	-99	56	49	15	14	18	18	1	1	6	7	5	5	156	2
78	E. notaeus	male	Paraguay	Asuncion	-57.6309	-25.2633	FMNH	9505	N/A	complete	140	24	164	0.55	5.5	2.7	1.5	1.3	1.7	1.6	221	53	46	12	12	16	17	3	2	8	6	6	5	148	3
543	E. notaeus	male	Paraguay	unknown	-57.9244	-21.2833	MNHNP	6884 Z 11581	N/A	complete	145	24.3	169.3	1	5.2	2	2	1.5	1.8	1.8	-99	50	47	15	15	18	18	1	1	6	7	5	5	134	3
545	E. notaeus	male	Paraguay	unknown	-56.7246	-27.459	MNHNP	6883 Z 11584	N/A	complete	160	26.5	186.5	0.95	4.8	3.2	1.6	1.5	1.9	1.8	-99	57	45	14	15	17	19	2	3	8	8	5	5	155	3
550	E. notaeus	male	Paraguay	unknown	-56.7246	-27.459	MNHNP	6886 Z 11589	N/A	complete	143	26.5	169.5	1.05	5.3	3.8	1.5	1.6	2	2	-99	55	46	14	15	18	18	1	1	7	7	6	5	146	3
560	E. notaeus	male	Paraguay	Modesta	-56.7246	-27.459	MNHNP	4849 Z 11359	N/A	complete	133.5	22.7	156.2	0.85	4.7	3.2	1.4	1.4	1.7	1.5	237	55	49	15	15	18	18	3	3	7	8	7	5	155	3
54	E. notaeus	male	Brasil	Corumba	-57.6243	-18.9922	FMNH	9084	N/A	complete	169.5	33	202.5	0.85	6.5	4.5	1.65	1.8	2.2	1.8	224	55	49	14	15	17	17	3	1	8	8	5	5	129	4
386	E. notaeus	male	Brasil	unknown	-56.75	-16.5	ZMH	4406	N/A	complete	191	30.5	221.5	0.9	6.3	4.3	2	1.8	2.2	1.8	229	53	47	15	14	19	16	1	1	7	7	6	5	137	4
590	E. notaeus	male	Brasil	Corumba	-57.6243	-18.9922	IB	7014	N/A	complete	146.5	25.8	172.3	0.7	6	3.7	1.3	1.45	1.9	1.8	222	54	47	15	14	19	17	1	1	8	7	6	5	140	4
591	E. notaeus	male	Brasil	Carandazal	-57.9296	-21.5404	IB	9304	N/A	head, skin	175.5	33	198.5	0.7	6.4	4	1.8	1.8	2.2	2	213	54	43	14	14	18	17	1	1	7	7	3	5	130	4
593	E. notaeus	male	Brasil	Carandazal	-57.9296	-21.5404	IB	9317	N/A	head, skin	173	32.8	205.8	0.8	5.4	3.4	1.6	1.5	2.1	1.9	223	58	48	14	15	19	19	0	0	7	8	3	5	133	4
605	E. notaeus	male	Brasil	Forte Coimbra	-58	-20	IB	27738	N/A	complete	142	26.5	168.5	0.7	5.8	4	1.5	1.5	2.2	1.9	225	54	45	14	14	18	17	1	0	7	7	6	5	126	4
413	E. notaeus	male	Bolivia	Prov. German Busch, Puerto Suarez "Laguna Caceres"	-57.6333	-18.95	MHNNKM	NKR 1152	N/A	complete	202.5	32	234.5	0.9	7.2	5	2.3	2.1	2.2	2.4	228	54	49	14	14	17	19	1	2	8	8	5	5	141	5
181	E. notaeus	male	unknown	unknown	-57.1897	-27.6573	AMNH	38018	N/A	complete	170	28.5	198.5	0.7	5.3	3.6	1.5	1.6	1.95	1.95	226	53	47	14	14	17	17	1	1	8	6	6	5	153	7
372	E. notaeus	male	unknown	unknown	-58.8703	-25.8087	MTKDD	17367	N/A	complete	134	23.5	157.5	0.75	5.2	3.2	1.4	1.4	1.9	1.8	226	49	51	14	14	18	17	0	0	6	6	6	5	126	7
382	E. notaeus	male	unknown	unknown	-55.343	-19.129	Darmstadt	RA-1147	N/A	complete	168	26	192	0.8	5.5	3.9	1.5	1.7	2.1	2.1	223	57	50	14	15	20	19	2	2	7	7	5	5	146	7
383	E. notaeus	male	unknown	unknown	-55.344	-19.13	Darmstadt	RA-1115	N/A	complete	194	32.5	226.5	1	6.6	4	1.9	2	2.5	2.3	226	52	45	14	14	19	18	0	1	8	7	5	5	146	7
N/A	E.notaeus	unknown	Argentina	Iberá Marshland	-56.72	-27.46	N/A	N/A	A03	N/A	N/A	N/A	N/A	N/A	N/A	N/A	N/A	N/A	N/A	N/A	N/A	N/A	N/A	N/A	N/A	N/A	N/A	N/A	N/A	N/A	N/A	N/A	N/A	N/A	N/A
N/A	E.notaeus	unknown	Argentina	Iberá Marshland	-56.72	-27.46	N/A	N/A	B03	N/A	N/A	N/A	N/A	N/A	N/A	N/A	N/A	N/A	N/A	N/A	N/A	N/A	N/A	N/A	N/A	N/A	N/A	N/A	N/A	N/A	N/A	N/A	N/A	N/A	N/A
N/A	E.notaeus	unknown	Argentina	Iberá Marshland	-56.72	-27.46	N/A	N/A	C03	N/A	N/A	N/A	N/A	N/A	N/A	N/A	N/A	N/A	N/A	N/A	N/A	N/A	N/A	N/A	N/A	N/A	N/A	N/A	N/A	N/A	N/A	N/A	N/A	N/A	N/A
N/A	E.notaeus	unknown	Argentina	Iberá Marshland	-56.72	-27.46	N/A	N/A	D03	N/A	N/A	N/A	N/A	N/A	N/A	N/A	N/A	N/A	N/A	N/A	N/A	N/A	N/A	N/A	N/A	N/A	N/A	N/A	N/A	N/A	N/A	N/A	N/A	N/A	N/A
N/A	E.notaeus	unknown	Argentina	Iberá Marshland	-56.72	-27.46	N/A	N/A	E03	N/A	N/A	N/A	N/A	N/A	N/A	N/A	N/A	N/A	N/A	N/A	N/A	N/A	N/A	N/A	N/A	N/A	N/A	N/A	N/A	N/A	N/A	N/A	N/A	N/A	N/A
N/A	E.notaeus	unknown	Argentina	Iberá Marshland	-56.72	-27.46	N/A	N/A	F03	N/A	N/A	N/A	N/A	N/A	N/A	N/A	N/A	N/A	N/A	N/A	N/A	N/A	N/A	N/A	N/A	N/A	N/A	N/A	N/A	N/A	N/A	N/A	N/A	N/A	N/A
N/A	E.notaeus	unknown	Argentina	Iberá Marshland	-56.72	-27.46	N/A	N/A	not_01_12	N/A	N/A	N/A	N/A	N/A	N/A	N/A	N/A	N/A	N/A	N/A	N/A	N/A	N/A	N/A	N/A	N/A	N/A	N/A	N/A	N/A	N/A	N/A	N/A	N/A	N/A
N/A	E.notaeus	unknown	Argentina	Iberá Marshland	-56.72	-27.46	N/A	N/A	not_02_13	N/A	N/A	N/A	N/A	N/A	N/A	N/A	N/A	N/A	N/A	N/A	N/A	N/A	N/A	N/A	N/A	N/A	N/A	N/A	N/A	N/A	N/A	N/A	N/A	N/A	N/A
N/A	E.notaeus	unknown	Argentina	Iberá Marshland	-56.72	-27.46	N/A	N/A	not_07_17	N/A	N/A	N/A	N/A	N/A	N/A	N/A	N/A	N/A	N/A	N/A	N/A	N/A	N/A	N/A	N/A	N/A	N/A	N/A	N/A	N/A	N/A	N/A	N/A	N/A	N/A
N/A	E.notaeus	unknown	Argentina	Iberá Marshland	-56.72	-27.46	N/A	N/A	Not_08_18	N/A	N/A	N/A	N/A	N/A	N/A	N/A	N/A	N/A	N/A	N/A	N/A	N/A	N/A	N/A	N/A	N/A	N/A	N/A	N/A	N/A	N/A	N/A	N/A	N/A	N/A
KF576726	Boa constrictor	unknown	unknown	unknown	unknown	unknown	unknown	unknown	KF576726_cytb
KF576727	Boa constrictor	unknown	unknown	unknown	unknown	unknown	unknown	unknown	KF576727_cytb
Eu273554	Boa constrictor	unknown	unknown	unknown	unknown	unknown	unknown	unknown	Eu273554_cytb
KF576914	Boa constrictor	unknown	unknown	unknown	unknown	unknown	unknown	unknown	KF576914_BDNF
KF576819	Boa constrictor	unknown	unknown	unknown	unknown	unknown	unknown	unknown	KF576819_BDNF
KF576908	Boa constrictor	unknown	unknown	unknown	unknown	unknown	unknown	unknown	KF576908_RAG1
AY988047	Boa constrictor	unknown	unknown	unknown	unknown	unknown	unknown	unknown	AY988047_NT3
KC330109	Boa constrictor	unknown	unknown	unknown	unknown	unknown	unknown	unknown	KC330109_NT3
DQ465531	Boa constrictor	unknown	unknown	unknown	unknown	unknown	unknown	unknown	DQ465531_ODC
HQ399543	Boa constrictor	unknown	unknown	unknown	unknown	unknown	unknown	unknown	HQ399543_C-mos
U69808	E. murinus	unknown	unknown	unknown	unknown	unknown	unknown	unknown	U69808_cytb
U69809	E. murinus	unknown	unknown	unknown	unknown	unknown	unknown	unknown	U69809_cytb
KC329952	E. murinus	unknown	unknown	unknown	unknown	unknown	unknown	unknown	KC329952_cytb
KC330075	E. murinus	unknown	unknown	unknown	unknown	unknown	unknown	unknown	KC330075_BDNF
KC330042	E. murinus	unknown	unknown	unknown	unknown	unknown	unknown	unknown	KC330042_RAG1
