# Supplementary material
Source: publisher figshare collection journal article supplement (https://brill.figshare.com/articles/dataset/_/21354816)
Supplement: Supplementary file 3 [file 1]

| GenBank #           | Species                       | Gene |
|---------------------|-------------------------------|------|
| OK349596            | <i>Eunectes murinus</i>       | NTF3 |
| OK349597            | <i>Eunectes murinus</i>       | NTF3 |
| OK349577 (2 ident.) | <i>Eunectes murinus</i>       | BDNF |
| OK349603            | <i>Eunectes murinus</i>       | Cmos |
| OK349623            | <i>Eunectes murinus</i>       | RAG1 |
| OK349624            | <i>Eunectes murinus</i>       | RAG1 |
| OK349635            | <i>Eunectes murinus</i>       | ODC  |
| OK349643            | <i>Eunectes murinus</i>       | CytB |
| OK349646            | <i>Eunectes murinus</i>       | CytB |
| OK349598            | <i>Eunectes notaeus</i>       | NTF3 |
| OK349599            | <i>Eunectes notaeus</i>       | NTF3 |
| OK349600            | <i>Eunectes notaeus</i>       | NTF3 |
| OK349601            | <i>Eunectes notaeus</i>       | Cmos |
| OK349580            | <i>Eunectes notaeus</i>       | BDNF |
| OK349621            | <i>Eunectes notaeus</i>       | RAG1 |
| OK349622            | <i>Eunectes notaeus</i>       | RAG1 |
| OK065103            | <i>Eunectes notaeus</i>       | CytB |
| OK349569            | <i>Eunectes deschauenseei</i> | BDNF |
| OK349570            | <i>Eunectes deschauenseei</i> | BDNF |
| OK349571            | <i>Eunectes deschauenseei</i> | BDNF |
| OK349572            | <i>Eunectes deschauenseei</i> | BDNF |

|          |                               |      |
|----------|-------------------------------|------|
| OK349573 | <i>Eunectes deschauenseei</i> | BDNF |
| OK349574 | <i>Eunectes deschauenseei</i> | BDNF |
| OK349575 | <i>Eunectes deschauenseei</i> | BDNF |
| OK349576 | <i>Eunectes deschauenseei</i> | BDNF |
| OK349577 | <i>Eunectes murinus</i>       | BDNF |
| OK349578 | <i>Eunectes deschauenseei</i> | BDNF |
| OK349585 | <i>Eunectes deschauenseei</i> | NTF3 |
| OK349586 | <i>Eunectes deschauenseei</i> | NTF3 |
| OK349587 | <i>Eunectes deschauenseei</i> | NTF3 |
| OK349588 | <i>Eunectes deschauenseei</i> | NTF3 |
| OK349589 | <i>Eunectes deschauenseei</i> | NTF3 |
| OK349590 | <i>Eunectes deschauenseei</i> | NTF3 |
| OK349591 | <i>Eunectes deschauenseei</i> | NTF3 |
| OK349592 | <i>Eunectes deschauenseei</i> | NTF3 |
| OK349593 | <i>Eunectes deschauenseei</i> | NTF3 |
| OK349594 | <i>Eunectes deschauenseei</i> | NTF3 |
| OK349595 | <i>Eunectes deschauenseei</i> | NTF3 |
| OK349604 | <i>Eunectes deschauenseei</i> | Cmos |
| OK349605 | <i>Eunectes deschauenseei</i> | Cmos |
| OK349606 | <i>Eunectes deschauenseei</i> | Cmos |
| OK349607 | <i>Eunectes deschauenseei</i> | Cmos |
| OK349608 | <i>Eunectes deschauenseei</i> | Cmos |
| OK349609 | <i>Eunectes deschauenseei</i> | Cmos |
| OK349602 | <i>Eunectes deschauenseei</i> | Cmos |
| OK349611 | <i>Eunectes deschauenseei</i> | RAG1 |
| OK349612 | <i>Eunectes deschauenseei</i> | RAG1 |
| OK349613 | <i>Eunectes deschauenseei</i> | RAG1 |
| OK349614 | <i>Eunectes deschauenseei</i> | RAG1 |

|          |                               |      |
|----------|-------------------------------|------|
| OK349615 | <i>Eunectes deschauenseei</i> | RAG1 |
| OK349616 | <i>Eunectes deschauenseei</i> | RAG1 |
| OK349617 | <i>Eunectes deschauenseei</i> | RAG1 |
| OK349618 | <i>Eunectes deschauenseei</i> | RAG1 |
| OK349619 | <i>Eunectes deschauenseei</i> | RAG1 |
| OK349625 | <i>Eunectes deschauenseei</i> | ODC  |
| OK349626 | <i>Eunectes deschauenseei</i> | ODC  |
| OK349627 | <i>Eunectes deschauenseei</i> | ODC  |
| OK349628 | <i>Eunectes deschauenseei</i> | ODC  |
| OK349629 | <i>Eunectes deschauenseei</i> | ODC  |
| OK349630 | <i>Eunectes deschauenseei</i> | ODC  |
| OK349632 | <i>Eunectes deschauenseei</i> | ODC  |
| OK349633 | <i>Eunectes deschauenseei</i> | ODC  |
| OK349634 | <i>Eunectes deschauenseei</i> | ODC  |
| OK349639 | <i>Eunectes deschauenseei</i> | CytB |
| OK349640 | <i>Eunectes deschauenseei</i> | CytB |
| OK349641 | <i>Eunectes deschauenseei</i> | CytB |
| OK349642 | <i>Eunectes deschauenseei</i> | CytB |
| OK349647 | <i>Eunectes deschauenseei</i> | CytB |
| OK349650 | <i>Eunectes deschauenseei</i> | CytB |
| OK349651 | <i>Eunectes deschauenseei</i> | CytB |
| OK349652 | <i>Eunectes deschauenseei</i> | CytB |
| OK349653 | <i>Eunectes deschauenseei</i> | CytB |
| OK349654 | <i>Eunectes deschauenseei</i> | CytB |
| OK065107 | <i>Eunectes deschauenseei</i> | CytB |
| OK349567 | <i>Eunectes beniensis</i>     | BDNF |
| OK349582 | <i>Eunectes beniensis</i>     | NTF3 |
| OK349583 | <i>Eunectes beniensis</i>     | NTF3 |

|          |                           |      |
|----------|---------------------------|------|
| OK349631 | <i>Eunectes beniensis</i> | ODC  |
| OK349636 | <i>Eunectes beniensis</i> | ODC  |
| OK349648 | <i>Eunectes beniensis</i> | CytB |
| OK349649 | <i>Eunectes beniensis</i> | CytB |
| OK349566 | <i>Boa constrictor</i>    | BDNF |
| OK349581 | <i>Boa constrictor</i>    | NTF3 |
| OK349610 | <i>Boa constrictor</i>    | Cmos |
| OK349620 | <i>Boa constrictor</i>    | RAG1 |
| OK349637 | <i>Boa constrictor</i>    | ODC  |
| OK349645 | <i>Boa constrictor</i>    | CytB |
