# Supplementary material
Source: publisher figshare collection journal article supplement (https://brill.figshare.com/articles/dataset/_/21354816)
Supplement: Supplementary file 4 [file 1]

| Character  | Factor 1 | Factor 2 | Factor 3 | Factor 4 |
|------------|----------|----------|----------|----------|
| % Variance | 44.8%    | 21.4%    | 6.0%     | 5.6%     |
| SVL        | .799     | .530     | .085     | -.068    |
| TL         | .821     | .516     | .037     | -.037    |
| HL         | .790     | .505     | .140     | -.171    |
| HW         | .753     | .512     | .175     | -.165    |
| SpL        | .202     | .202     | -.698    | .599     |
| L zw A     | .714     | .592     | .105     | -.098    |
| SEL        | .690     | .556     | .069     | -.079    |
| 10 SC      | .353     | .667     | -.374    | .304     |
| 30 V       | .435     | .769     | .131     | -.017    |
| TLL        | .817     | .386     | -.231    | .165     |
| DO         | .822     | -.477    | -.108    | -.061    |
| SC         | .770     | -.448    | -.076    | -.059    |
| Orb re     | .291     | -.188    | .486     | .493     |
| Orb li     | .289     | -.168    | .480     | .560     |
| SL re      | .739     | -.426    | -.026    | .026     |
| SL li      | .732     | -.357    | .076     | .072     |
| IL re      | .724     | -.522    | -.033    | .028     |
| IL li      | .782     | -.473    | -.083    | .033     |
| SOS re     | .810     | -.472    | .043     | -.050    |
| SOS li     | .809     | -.459    | -.034    | -.053    |
| Sch um Fr  | .011     | -.122    | -.269    | -.326    |
| B          | -.350    | .150     | .169     | .189     |
| HS         | -.847    | .464     | .101     | .074     |
