# Supplementary material
Source: publisher figshare collection journal article supplement (https://brill.figshare.com/articles/dataset/_/21354816)
Supplement: Supplementary file 5 [file 1]

| pop samples             | 2n | %pL  | H <sub>e</sub> | var(H <sub>e</sub> ) |
|-------------------------|----|------|----------------|----------------------|
| <i>E. deschauenseei</i> | 18 | 0.67 | 0.23           | (0.043)              |
| <i>E. murinus</i>       | 4  | 0.15 | 0.43           | (0.124)              |
| <i>E. notaeus</i>       | 14 | 0.55 | 0.19           | (0.034)              |
| <i>E. beniensis</i>     | 4  | 0.18 | 0.35           | (0.087)              |
| pooled <i>not+ben</i>   | 18 | 0.68 | 0.20           | (0.199)              |
